# Supplementary material for: Rapid and quantitative detection of the inflammatory marker neopterin based on a visible luminescent Zn(ii)–Eu(iii) nanocluster
Source: Royal Society of Chemistry journal article supplement (doi:10.1039/d2cc06504e), 2023-01-01
Supplement: d2cc06504e1.pdf [file d2cc06504e1.pdf]

## Supporting Information

### Rapid and Quantitative Detection of the Inflammatory Marker Neopterin Based on a Visible Luminescent Zn(II)-Eu(III) Nanocluster

Jinni Zhao, Xilong Leng, Jiazhao Lin, Xiaoping Yang, Xiaoli Lv, Xianfeng Huang, Zhi Yang, and Desmond Schipper

#### Contents

|                                                                                                    |    |
|----------------------------------------------------------------------------------------------------|----|
| 1. General Procedures .....                                                                        | 1  |
| 2. Synthesis of H <sub>2</sub> L, <b>1</b> and the Gd(III) analogue.....                           | 3  |
| 3. IR spectra of H <sub>2</sub> L and <b>1</b> .....                                               | 5  |
| 4. The PXRD spectrum of <b>1</b> .....                                                             | 5  |
| 5. The thermogravimetric analysis of <b>1</b> .....                                                | 6  |
| 6. UV-vis absorption spectra of H <sub>2</sub> L, <b>1</b> and Neo .....                           | 6  |
| 7. The excitation and emission spectra of H <sub>2</sub> L, <b>1</b> and Neo .....                 | 7  |
| 8. The emission spectra of the Gd(III) analogue at 77 K.....                                       | 8  |
| 9. The emission spectra of <b>1</b> with the addition of Neo in 24 hrs in CH <sub>3</sub> CN ..... | 8  |
| 10. Chemical structures of Neo and interferents .....                                              | 9  |
| 11. The emission spectra of <b>1</b> with the addition of interferents in CH <sub>3</sub> CN ..... | 10 |
| 12. UV-vis and emission spectra of <b>1</b> with the addition of Neo in H <sub>2</sub> O .....     | 11 |
| 13. UV-vis titration of <b>1</b> with the addition of Neo in CH <sub>3</sub> CN .....              | 12 |
| 14. The excitation and emission spectra of Neo .....                                               | 12 |
| 15. X-Ray Crystallography .....                                                                    | 13 |

## 1. General Procedures

All chemical materials and solvents were purchased from commercial sources. IR spectra were determined on a FTIR-650 spectrometer. The thermogravimetric analyses were carried out on a Perking Elmer Diamond TG-DTA spectrum GX. The sample is under a N<sub>2</sub> flow of 200 mL min<sup>-1</sup>, and heated from room temperature to 800 °C with a heating rate of 5°C min<sup>-1</sup>. NMR spectra were recorded on an AVANCE III AV500 at 298 K. Dynamic light scattering (DLS) measurement was carried out on a Malvern Zetasizer Nano ZS. Scanning electron microscopy (SEM) and elemental mapping images were obtained from a Nova NanoSEM 200 microscope. Transmission electron microscopy (TEM) images were recorded on a JEOL JEM-2100F transmission electron microscope with the sample after dried from the CH<sub>3</sub>CN solution. The UV-vis absorbance spectra were measured on an UV-3600 spectrophotometer. Visible emission spectra were recorded on a FLS 980 fluorimeter. The light source for the spectra was a 450 W xenon arc lamp with continuous spectral distribution from 190 to 2600 nm. The luminescence detection to the analyte was carried out in fetal calf serum (FCS), and simulated urine containing Na<sub>2</sub>SO<sub>4</sub>, NH<sub>4</sub>Cl, NaCl, KCl, creatinine, creatine, glucose, glycine and urea. The color of emission light of the complex with the addition of the analyte was checked using a ZF-20D UV lamp. The test papers used to detect the analyte were prepared by soaking the strip-type filter papers in the CH<sub>3</sub>CN solution of the complex for 10 mins, and then dried in oven at 110 °C overnight.

**The analysis of frontier molecular orbitals.** The energy levels of frontier molecular orbitals of the Schiff base ligand were calculated using density functional theory (DFT) in the Gaussian16 package.<sup>[1]</sup> The input structure was derived from the cif file. Optimizations are carried out in gas phase using the B3LYP functional.<sup>[2]</sup> All the optimizations are carried out with 6-311++G\*\* and Stuttgart effective core-potential (ECP).<sup>[3]</sup>

[1] Frisch, M. J.; Trucks, G. W.; Schlegel, H. B.; Scuseria, G. E.; Robb, M. A.; Cheeseman, J. R.; Scalmani, G.; Barone, V.; Petersson, G. A.; Nakatsuji, H.; Li, X.; Caricato, M.; Marenich, A. V.; Bloino, J.; Janesko, B. G.; Gomperts, R.; Mennucci, B.;

Hratchian, H. P.; Ortiz, J. V.; Izmaylov, A. F.; Sonnenberg, J. L.; Williams-Young, D.; Ding, F.; Lipparini, F.; Egidi, F.; Goings, J.; Peng, B.; Petrone, A.; Henderson, T.; Ranasinghe, D.; Zakrzewski, V. G.; Gao, J.; Rega, N.; Zheng, G.; Liang, W.; Hada, M.; Ehara, M.; Toyota, K.; Fukuda, R.; Hasegawa, J.; Ishida, M.; Nakajima, T.; Honda, Y.; Kitao, O.; Nakai, H.; Vreven, T.; Throssell, K.; Montgomery, J. A.; Peralta, Jr., J. E.; Ogliaro, F.; Bearpark, M. J.; Heyd, J. J.; Brothers, E. N.; Kudin, K. N.; Staroverov, V. N.; Keith, T. A.; Kobayashi, R.; Normand, J.; Raghavachari, K.; Rendell, A. P.; Burant, J. C.; Iyengar, S. S.; Tomasi, J.; Cossi, M.; Millam, J. M.; Klene, M.; Adamo, C.; Cammi, R.; Ochterski, J. W.; Martin, R. L.; Morokuma, K.; Farkas, O.; Foresman, J. B.; Fox, D. J. *Gaussian 16, Revision C.01, Gaussian, Inc., Wallingford CT, 2019*.

[2] (a) Becke, A. D. *J. Chem. Phys.* **1993**, *98*, 5648-5652; (b) Lee, C.; Yang, W.; Parr, R. G. *Phys. Rev. B* **1988**, *37*, 785-789; (c) Vosko, S. H.; Wilk, L.; Nusair, M.; *Can. J. Phys.* **1980**, *58*, 1200-1211; (d) Stephens, P. J.; Devlin, F. J.; Chabalowski, C. F.; Frisch, M. J. *J. Phys. Chem.* **1994**, *98*, 11623-11627.

[3] (a) Dolg, M.; Wedig, U.; Stoll, H.; Preuss, H. *J. Chem. Phys.* **1987**, *86*, 866-872; (b) Dolg, M.; Stoll, H.; Preuss, H. *J. Chem. Phys.* **1989**, *90*, 1730-1734.

## 2. Synthesis of H<sub>2</sub>L, 1 and the Gd(III) analogue

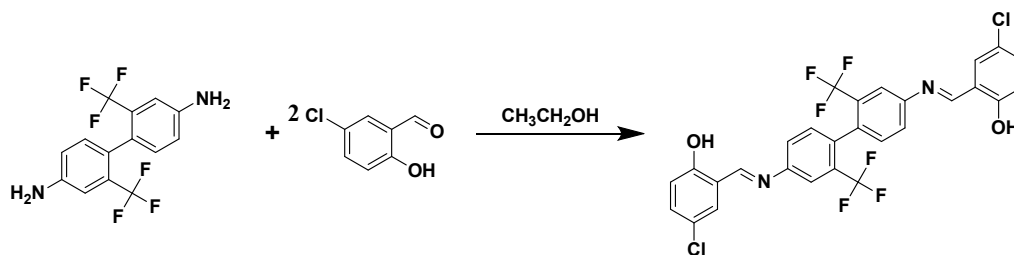

**Scheme S1.** The synthetic route of H<sub>2</sub>L.

**Synthesis of H<sub>2</sub>L.** A 10 mL EtOH solution of 2,2'-bis(trifluoromethyl)benzidine (1.5 mmol, 0.48 g) was added drop by drop to a 10 mL EtOH solution of 5-chlorosalicylaldehyde (3.0 mmol, 0.47 g). The resulting solution was stirred and heated at 100°C for 3 hrs to give light yellow solid of H<sub>2</sub>L. The product was obtained by vacuum filtration, and washed three times using EtOH (3 × 5 mL). Yield: 0.86 g (96%).  
<sup>1</sup>H NMR (500 MHz, DMSO, δ): 12.47 (s, 2H), 9.06 (s, 2H), 7.89 (s, 2H), 7.81 (d, J = 2.5 Hz, 2H), 7.75 (d, J = 8.1 Hz, 2H), 7.50–7.48 (m, 4H), 7.05 (d, J = 8.7 Hz, 2H). <sup>13</sup>C NMR (500 MHz, DMSO, δ): 163.8, 158.8, 148.7, 134.6, 133.3, 133.1, 131.0, 128.5, 124.4, 123.6, 122.8, 120.7, 119.3, 118.8. IR (KBr, cm<sup>-1</sup>): 3874 (m), 3385 (s), 1571 (s), 1426 (s), 1260 (w), 1165 (m), 1129 (w), 952 (w), 689 (s), 619 (m).

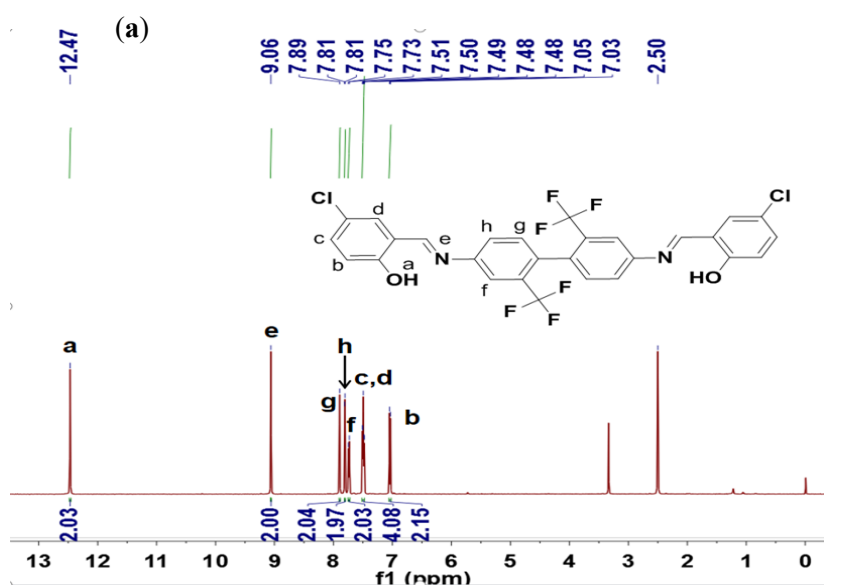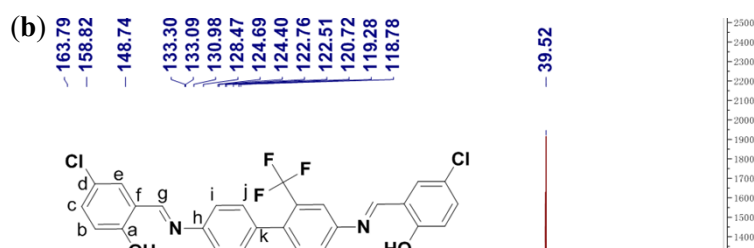

<sup>13</sup>C NMR (500 MHz, DMSO) δ 163.8(g), 158.8(d),  
148.7(h), 134.6(c), 133.3(l), 133.1(b), 131.0(j), 128.5(k),  
124.4(i), 123.6(m), 122.8(a), 120.7(n), 119.3(f), 118.8(e).

**Figure S1.** <sup>1</sup>H NMR (a) and <sup>13</sup>C NMR (b) spectra of the ligand H<sub>2</sub>L.

**Synthesis of the nanocluster 1.** Eu(OAc)<sub>3</sub>·6H<sub>2</sub>O (0.20 mmol, 0.065g), Zn(CF<sub>3</sub>SO<sub>3</sub>)<sub>2</sub>·4H<sub>2</sub>O (0.20 mmol, 0.073 g), H<sub>2</sub>L (0.20 mmol, 0.12 g) were dissolved in a mixed solution of EtOH (6 mL), MeOH (4 mL) and DMF (1mL), and then triethylamine in 1 mL of MeOH (1.0 mol/L) was added. The resulting solution was heated to reflux with stirring in the air for 30 mins, and then left to cool at room temperature. The yellow crystalline product of **1** was formed after one month by slow vapor diffusion of diethyl ether into the solution. Yield (based on Eu(OAc)<sub>3</sub>·4H<sub>2</sub>O): 0.0130g (15%). IR (KBr, cm<sup>-1</sup>): 3867 (s), 3658 (s), 3390 (m), 1562 (s), 1420 (s), 1253 (w), 1168 (m), 1036 (m), 945 (w), 838 (w), 672 (m), 628 (m). m. p. > 236 °C (decomposed).

**Synthesis of the Gd(III) analogue:** The synthetic procedure was the same as that for **1** using Gd(OAc)<sub>3</sub>·6H<sub>2</sub>O (0.20 mmol, 0.088 g), Zn(CF<sub>3</sub>SO<sub>3</sub>)<sub>2</sub>·4H<sub>2</sub>O (0.2 mmol, 0.087 g), H<sub>2</sub>L (0.20 mmol, 0.12 g). The yellow crystalline product of the Gd(III) analogue was obtained after one month by slow vapor diffusion of diethyl ether into the solution. Yield (based on Gd(OAc)<sub>3</sub>·6H<sub>2</sub>O): 0.0123 g (12%). IR (KBr, cm<sup>-1</sup>): 3857 (s), 3654 (s), 3395 (m), 1572 (s), 1410 (s), 1248 (w), 1170 (m), 1030 (m), 943 (w), 835 (w), 682(m), 613 (m). m. p. > 239 °C (decompose).

### 3. IR spectra of H<sub>2</sub>L and 1

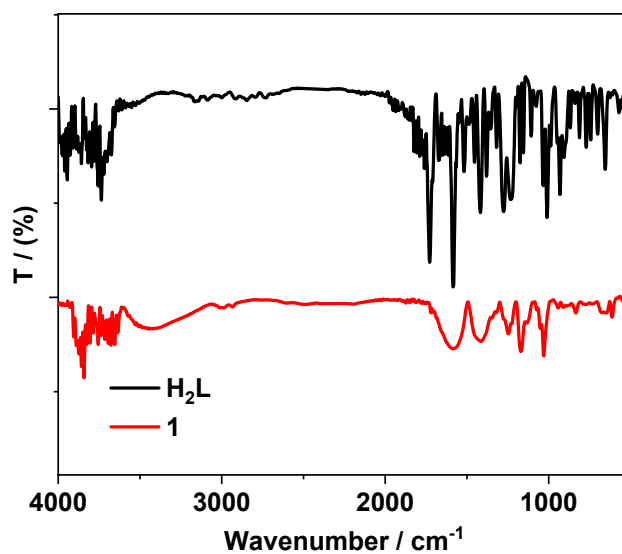

Figure S2. IR spectra of the ligand H<sub>2</sub>L and 1.

### 4. The PXRD spectrum of 1

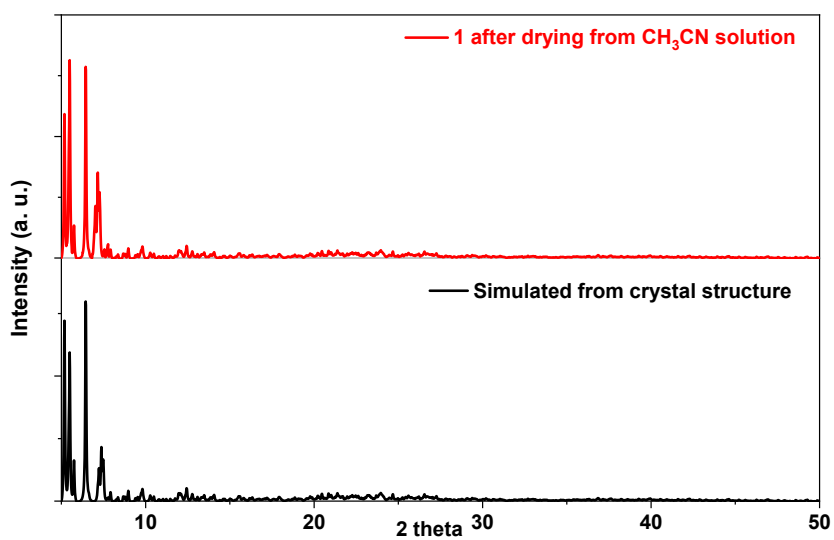

Figure S3. The PXRD spectrum of the solid sample of 1 (red).

## 5. The thermogravimetric analysis of **1**

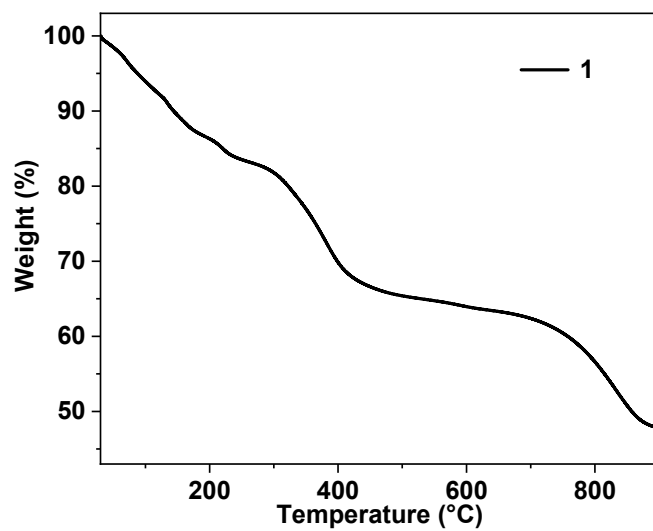

**Figure S4.** The thermogravimetric analysis of **1**.

## 6. UV-vis absorption spectra of H<sub>2</sub>L, **1** and Neo

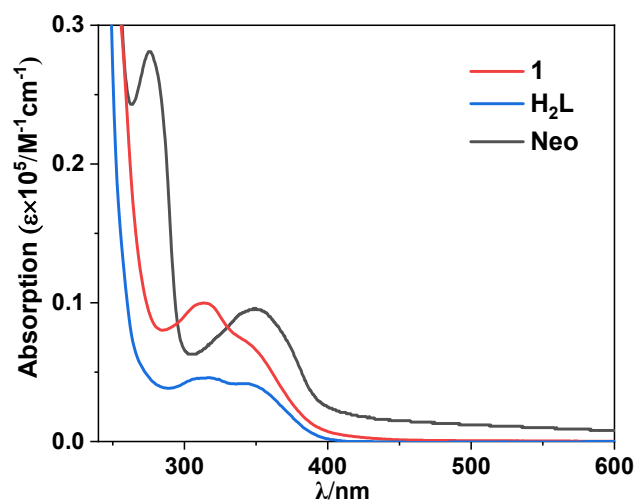

**Figure S5.** UV-vis absorption spectra of H<sub>2</sub>L, **1** and Neo in CH<sub>3</sub>CN (*c* = 10 μM).

## 7. The excitation and emission spectra of H<sub>2</sub>L, **1** and Neo

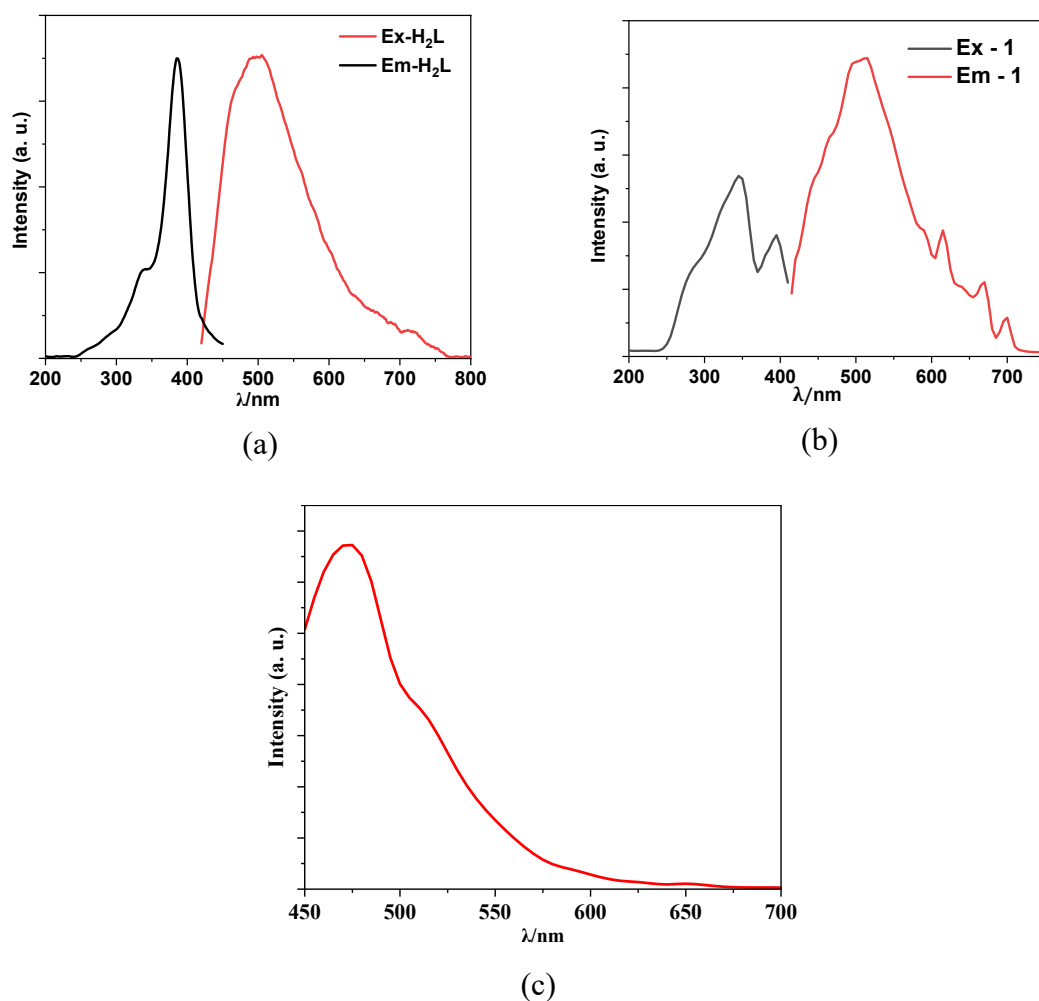

**Figure S6.** (a) The excitation ( $\lambda_{em} = 510$  nm) and emission ( $\lambda_{ex} = 395$  nm) spectra of free ligand H<sub>2</sub>L (10 μM) in CH<sub>3</sub>CN at room temperature. (b) The excitation ( $\lambda_{em} = 616$  nm) and emission ( $\lambda_{ex} = 395$  nm) spectra of **1** (10 μM) in CH<sub>3</sub>CN. (c) The emission spectrum of Neo (20 μM) in CH<sub>3</sub>CN ( $\lambda_{ex} = 395$  nm).



## 8. The emission spectra of the Gd(III) analogue at 77 K

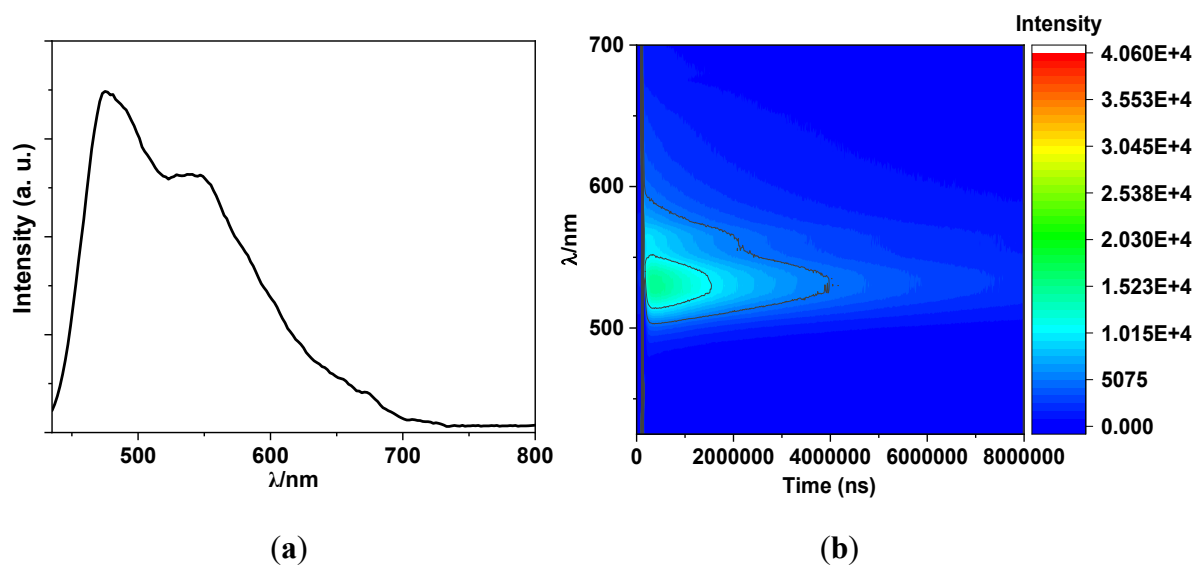

**Figure S7.** The 2-D (a) and 3-D (b) emission spectra of the Gd(III) analogue (10  $\mu\text{M}$ ) in  $\text{CH}_3\text{CN}$  at 77 K. ( $\lambda_{\text{ex}} = 395 \text{ nm}$ )

## 9. The emission spectra of **1** with the addition of Neo in 24 hrs in $\text{CH}_3\text{CN}$

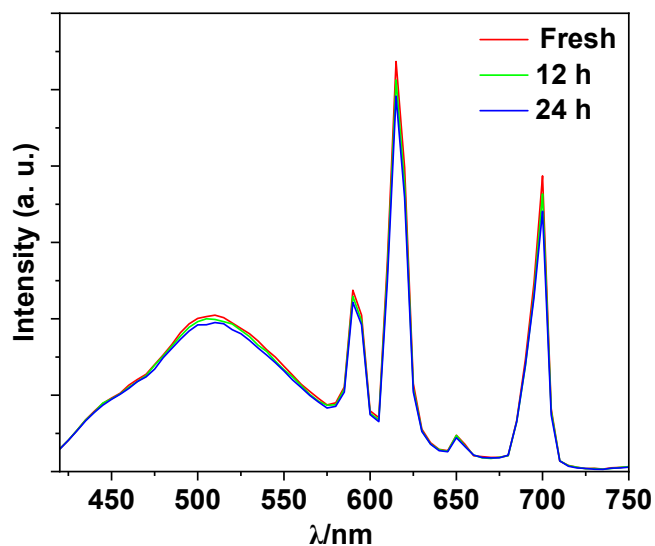

**Figure S8.** The emission spectra of **1** (10  $\mu\text{M}$ ) with the addition of Neo (10  $\mu\text{M}$ ) in 24 hrs.

## 10. Chemical structures of Neo and interferents

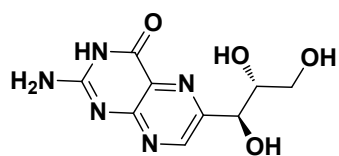

Neopterin (**Neo**)

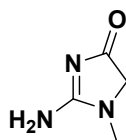

Creatinine (**Cre**)

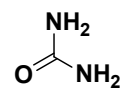

Urea (**Ure**)

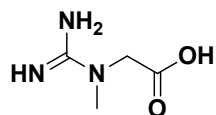

Creatine (**Crt**)

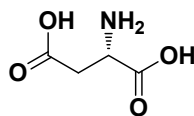

L-Aspartic Acid (**Asp**)

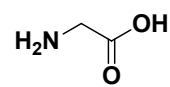

Glycine (**Gly**)

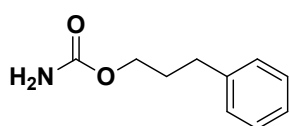

Phenprobamate (**Phe**)

**Scheme S2.** Chemical structures of Neo and interferents.

## 11. The emission spectra of 1 with the addition of interferents in CH<sub>3</sub>CN

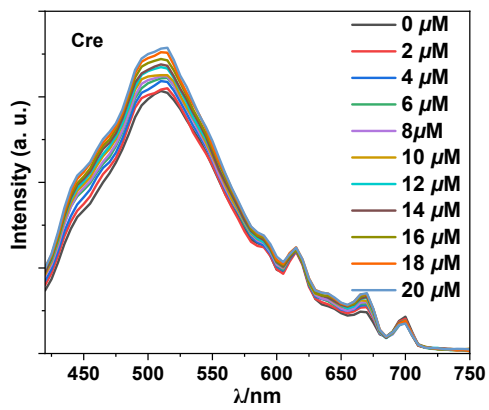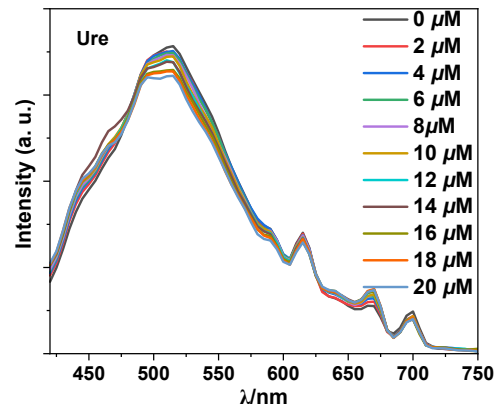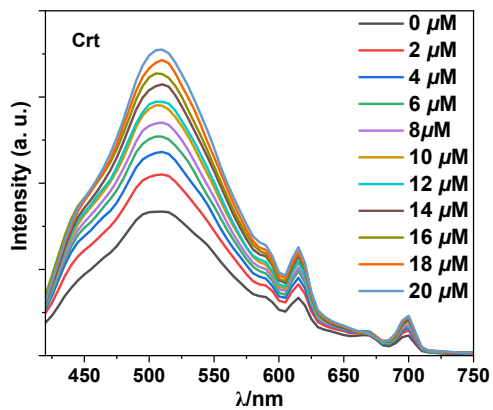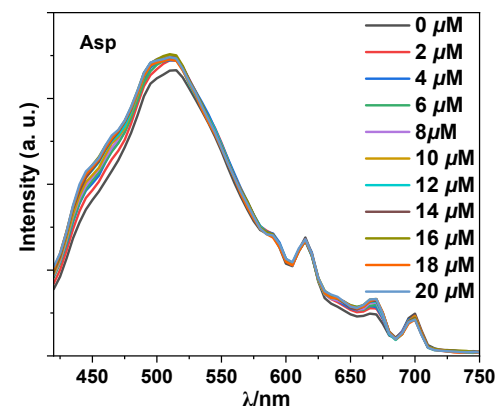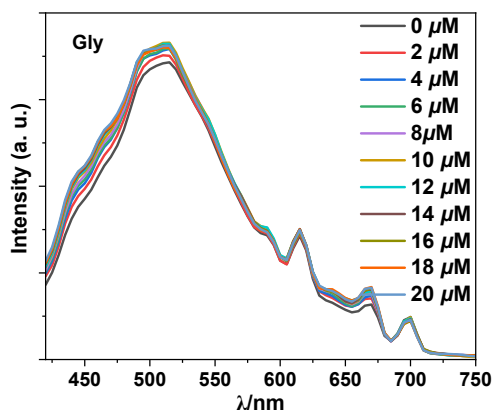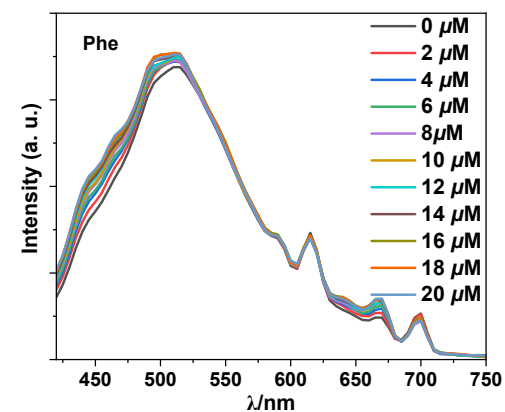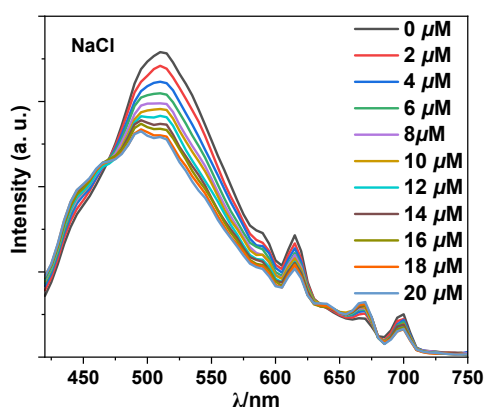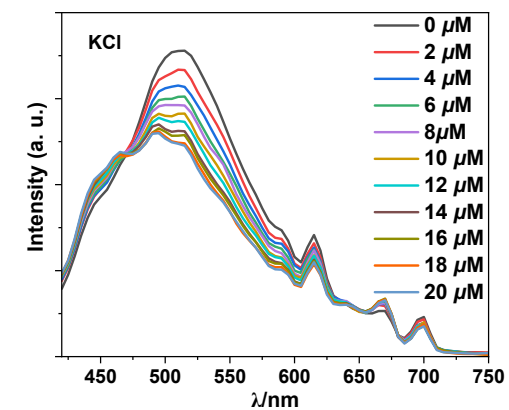

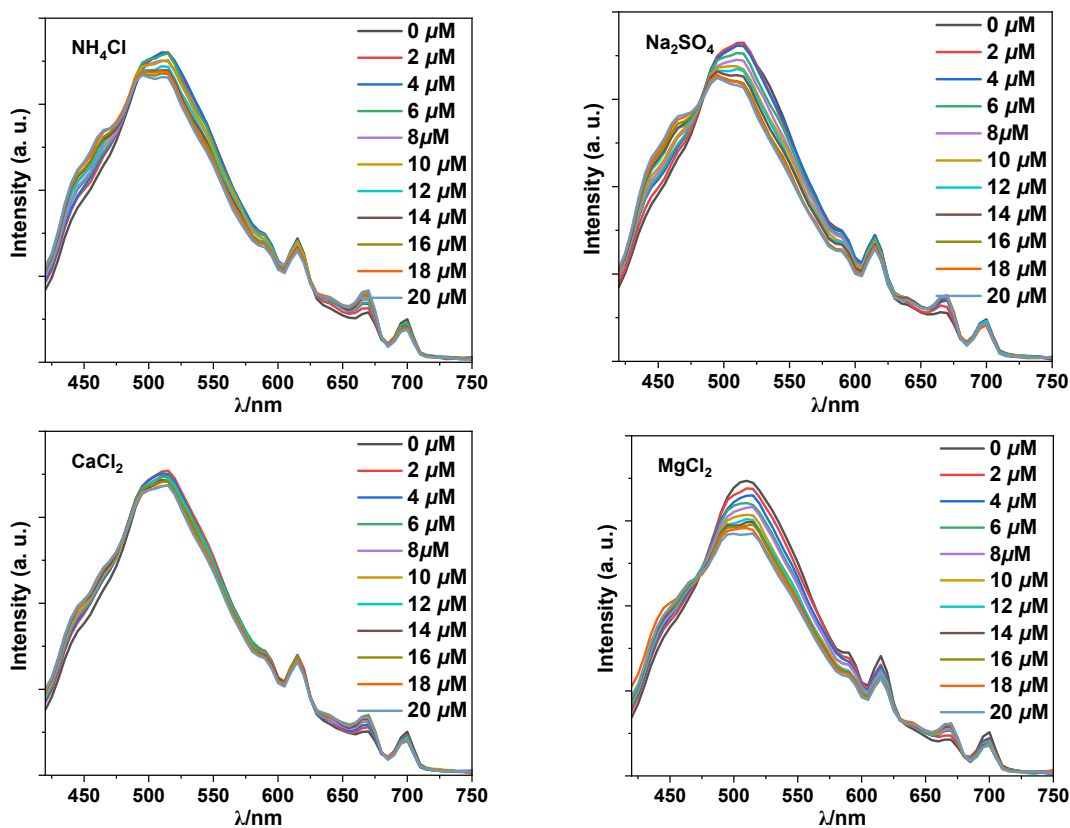

**Figure S9.** The emission spectra of **1** (10  $\mu\text{M}$ ) with the addition of interferents in  $\text{CH}_3\text{CN}$ . ( $\lambda_{\text{ex}} = 395 \text{ nm}$ )

## 12. UV-vis and emission spectra of **1** with the addition of Neo in $\text{H}_2\text{O}$

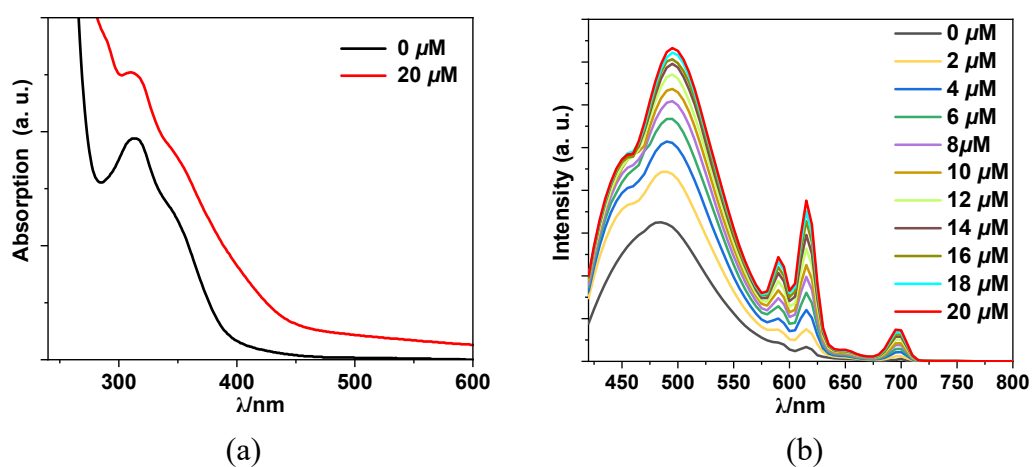

**Figure S10.** UV-vis spectra (a) and emission spectra (b) of **1** (10  $\mu\text{M}$ ) with the addition of Neo in  $\text{H}_2\text{O}$ . ( $\lambda_{\text{ex}} = 395 \text{ nm}$ )

### 13. UV-vis titration of 1 with the addition of Neo in CH<sub>3</sub>CN

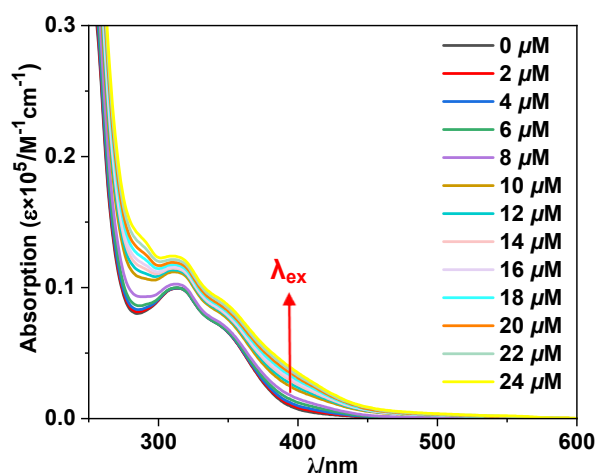

**Figure S11.** UV-vis titration of 1 (10 μM) with the addition of Neo in CH<sub>3</sub>CN.

### 14. The excitation and emission spectra of Neo

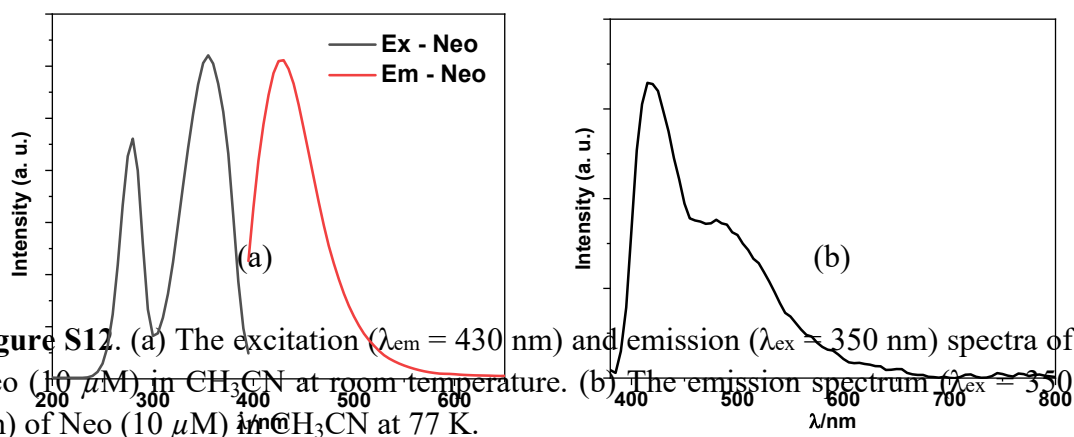

**Figure S12.** (a) The excitation ( $\lambda_{em} = 430$  nm) and emission ( $\lambda_{ex} = 350$  nm) spectra of Neo (10 μM) in CH<sub>3</sub>CN at room temperature. (b) The emission spectrum ( $\lambda_{ex} = 350$  nm) of Neo (10 μM) in CH<sub>3</sub>CN at 77 K.

### 15. X-Ray Crystallography

Data were collected on a Smart APEX CCD diffractometer with graphite monochromated Mo-K $\alpha$  radiation ( $\lambda = 0.71073$  Å) at 233 K. The data set was corrected

for absorption based on multiple scans and reduced using standard methods. Data reduction was performed using DENZO-SMN.<sup>1</sup> The structure was solved by Olex2 program. Coordinates of the non-hydrogen atoms were refined anisotropically, while hydrogen atoms were included in the calculation isotropically but not refined. Neutral atom scattering factors were taken from Cromer and Waber.<sup>2</sup> Some uncoordinated solvent molecules such as H<sub>2</sub>O were found to be badly disordered. Attempts to model the disorder were unsatisfactory. The contributions to the scattering factors due to these solvent molecules were removed by use of the utility SQUEEZE (Sluis and Spek, 1990) in PLATON98 (Spek, 1998). PLATON98 was used as incorporated in WinGX (Farrugia, 1999). Crystallographic data for **1** (CCDC reference number 2222896) are presented in Table S1 and selected bond lengths and angles are given in Table S2. See <http://www.rsc.org/suppdata/cc/> for crystallographic data in CIF format.

**Ref.** (1) DENZO-SMN. (1997). Z. Otwinowski, W. Minor, *Methods in Enzymology*, 276: *Macromolecular Crystallography, Part A*, 307 – 326, C. W. J. Carter, M. I. Simon, R. M. Sweet, Editors, Academic Press.

(2) D. T. Cromer, J. T. Waber, *International Tables for X-Ray Crystallography*, Kynoch Press, Birmingham, vol. 4, 1974, Table 2.2A.

**Table S1.** Crystal data and structure refinement for **1**.

|                |                                                                                                                                                    |
|----------------|----------------------------------------------------------------------------------------------------------------------------------------------------|
|                | <b>1</b>                                                                                                                                           |
| Formula        | C <sub>190</sub> H <sub>296</sub> Cl <sub>4</sub> Eu <sub>26</sub> F <sub>18</sub> N <sub>4</sub> O <sub>204</sub> S <sub>2</sub> Zn <sub>22</sub> |
| Fw             | 11837.21                                                                                                                                           |
| Crystal system | Triclinic                                                                                                                                          |

|                                                                          |                |
|--------------------------------------------------------------------------|----------------|
| Space group                                                              | P-1            |
| <i>a</i> [Å]                                                             | 19.8012(12)    |
| <i>b</i> [Å]                                                             | 22.2405(13)    |
| <i>c</i> [Å]                                                             | 25.7774(15)    |
| $\alpha$ [deg]                                                           | 85.1870(10)    |
| $\beta$ [deg]                                                            | 85.3070(10)    |
| $\gamma$ [deg]                                                           | 72.3620(10)    |
| <i>V</i> [Å <sup>3</sup> ]                                               | 10761.2(11)    |
| <i>d</i> / [g/cm <sup>3</sup> ]                                          | 1.810          |
| <i>Z</i>                                                                 | 1              |
| <i>T</i> [K]                                                             | 233(1)         |
| F(000)                                                                   | 5596           |
| $\mu$ , mm <sup>-1</sup>                                                 | 5.045          |
| $\theta$ rang, deg                                                       | 0.96-25.00     |
| reflns meads                                                             | 37557          |
| reflns used                                                              | 37557          |
| params                                                                   | 2053           |
| R1 <sup>a</sup> , wR2 <sup>a</sup> [ <i>I</i> > 2 $\sigma$ ( <i>I</i> )] | 0.0667, 0.1725 |
| R1, wR2 (all data)                                                       | 0.1193, 0.1924 |
| Quality of fit                                                           | 1.014          |

<sup>a</sup> R1 =  $\frac{\sum |F_o| - |F_c|}{\sum |F_o|}$ , wR2 =  $[\frac{\sum w[(F_o^2 - F_c^2)^2]}{\sum [w(F_o^2)]}]^{1/2}$ ,  
 $w=1/[\sigma^2(F_o^2)+(0.075P)^2]$ , where  $P = [\max(F_o^2, 0) + 2F_c^2]/3$ .

**Table S2.** Selected Bond Lengths (Å) and angles (°) for **1**

|             |           |             |           |
|-------------|-----------|-------------|-----------|
| Eu(1)-O(3)  | 2.264(10) | Eu(1)-O(31) | 2.284(9)  |
| Eu(1)-O(5)  | 2.271(14) | Eu(1)-O(36) | 2.356(10) |
| Eu(1)-O(9)  | 2.251(10) | Eu(2)-O(13) | 2.339(9)  |
| Eu(1)-O(11) | 2.412(12) | Eu(2)-O(14) | 2.321(9)  |
| Eu(1)-O(13) | 2.990(10) | Eu(2)-O(31) | 2.287(9)  |
| Eu(1)-O(20) | 2.272(10) | Eu(2)-O(32) | 2.378(9)  |

|             |           |              |           |
|-------------|-----------|--------------|-----------|
| Eu(2)-O(35) | 2.357(9)  | Eu(7)-O(87)  | 2.278(10) |
| Eu(2)-O(36) | 2.357(10) | Eu(8)-O(35)  | 2.357(9)  |
| Eu(2)-O(40) | 2.289(8)  | Eu(8)-O(37)  | 2.265(9)  |
| Eu(2)-O(43) | 2.447(9)  | Eu(8)-O(39)  | 2.335(9)  |
| Eu(3)-O(20) | 2.255(9)  | Eu(8)-O(40)  | 2.332(9)  |
| Eu(3)-O(23) | 2.323(9)  | Eu(8)-O(43)  | 2.444(9)  |
| Eu(3)-O(30) | 2.300(10) | Eu(8)-O(60)  | 2.297(9)  |
| Eu(3)-O(31) | 2.384(9)  | Eu(8)-O(75)  | 2.333(9)  |
| Eu(3)-O(32) | 2.332(10) | Eu(8)-O(91)  | 2.356(9)  |
| Eu(3)-O(41) | 2.337(9)  | Eu(9)-O(63)  | 2.350(9)  |
| Eu(3)-O(70) | 2.372(9)  | Eu(9)-O(64)  | 2.260(10) |
| Eu(3)-O(92) | 2.302(10) | Eu(9)-O(71)  | 2.291(10) |
| Eu(4)-O(19) | 2.296(11) | Eu(9)-O(75)  | 2.296(9)  |
| Eu(4)-O(21) | 2.313(11) | Eu(9)-O(76)  | 2.268(11) |
| Eu(4)-O(23) | 2.323(9)  | Eu(9)-O(87)  | 3.065(11) |
| Eu(4)-O(25) | 2.333(12) | Eu(9)-O(88)  | 2.290(10) |
| Eu(4)-O(26) | 2.269(13) | Eu(9)-O(91)  | 2.300(9)  |
| Eu(4)-O(70) | 2.475(10) | Eu(10)-O(42) | 2.338(8)  |
| Eu(4)-O(92) | 2.318(9)  | Eu(10)-O(53) | 2.300(9)  |
| Eu(4)-O(96) | 2.348(9)  | Eu(10)-O(54) | 2.292(8)  |
| Eu(5)-O(17) | 2.420(10) | Eu(10)-O(55) | 2.408(9)  |
| Eu(5)-O(41) | 2.445(9)  | Eu(10)-O(60) | 2.379(9)  |
| Eu(5)-O(42) | 2.435(8)  | Eu(10)-O(63) | 2.279(8)  |
| Eu(5)-O(44) | 2.429(10) | Eu(10)-O(67) | 2.296(10) |
| Eu(5)-O(45) | 2.450(10) | Eu(10)-O(91) | 2.327(9)  |
| Eu(5)-O(48) | 2.288(9)  | Eu(11)-O(16) | 2.281(10) |
| Eu(5)-O(53) | 2.280(8)  | Eu(11)-O(39) | 2.927(10) |
| Eu(5)-O(92) | 2.318(9)  | Eu(11)-O(60) | 2.263(8)  |
| Eu(5)-O(96) | 2.300(9)  | Eu(11)-O(61) | 2.249(11) |
| Eu(6)-O(12) | 2.271(12) | Eu(11)-O(63) | 2.311(9)  |
| Eu(6)-O(14) | 2.268(10) | Eu(11)-O(73) | 2.353(11) |
| Eu(6)-O(35) | 2.303(9)  | Eu(11)-O(75) | 2.331(9)  |
| Eu(6)-O(37) | 2.324(9)  | Eu(11)-O(93) | 2.270(11) |
| Eu(6)-O(38) | 2.263(12) | Eu(12)-O(46) | 2.270(11) |
| Eu(6)-O(68) | 2.312(13) | Eu(12)-O(48) | 2.344(9)  |
| Eu(6)-O(80) | 2.488(14) | Eu(12)-O(52) | 2.305(10) |
| Eu(6)-O(98) | 2.361(12) | Eu(12)-O(53) | 2.365(9)  |
| Eu(7)-O(14) | 2.357(9)  | Eu(12)-O(54) | 2.335(9)  |
| Eu(7)-O(37) | 2.357(10) | Eu(12)-O(55) | 2.478(9)  |
| Eu(7)-O(40) | 2.246(9)  | Eu(12)-O(56) | 2.285(10) |
| Eu(7)-O(69) | 2.178(12) | Eu(12)-O(59) | 2.346(11) |
| Eu(7)-O(78) | 2.582(11) | Eu(13)-O(7)  | 2.267(11) |
| Eu(7)-O(79) | 2.342(11) | Eu(13)-O(20) | 2.372(10) |
| Eu(7)-O(85) | 2.306(12) | Eu(13)-O(29) | 2.303(12) |



|               |           |                   |           |
|---------------|-----------|-------------------|-----------|
| Eu(13)-O(32)  | 2.275(9)  | Zn(9)-O(96)       | 2.053(9)  |
| Eu(13)-O(36)  | 2.274(10) | Zn(10)-O(48)      | 2.058(9)  |
| Eu(13)-O(83)  | 2.278(12) | Zn(10)-O(50)      | 2.050(10) |
| Eu(13)-O(86)  | 2.290(13) | Zn(10)-O(51)      | 2.067(10) |
| Zn(1)-N(1)    | 2.097(14) | Zn(10)-O(54)      | 2.060(8)  |
| Zn(1)-O(1)    | 2.049(11) | Zn(10)-O(95)      | 2.071(8)  |
| Zn(1)-O(3)    | 2.080(10) | Zn(11)-O(55)      | 1.933(9)  |
| Zn(1)-O(8)    | 1.991(13) | Zn(11)-O(57)      | 1.950(14) |
| Zn(1)-O(10)   | 2.005(13) | Zn(11)-O(58)      | 1.945(15) |
| Zn(2)-O(1)    | 2.006(12) | Zn(11)-O(66)      | 1.921(13) |
| Zn(2)-O(3)    | 1.957(10) | O(3)-Eu(1)-O(5)   | 78.7(4)   |
| Zn(2)-O(4)    | 1.946(16) | O(3)-Eu(1)-O(11)  | 76.9(4)   |
| Zn(2)-O(6)    | 1.913(14) | O(3)-Eu(1)-O(13)  | 154.9(4)  |
| Zn(3)-O(18)   | 1.993(14) | O(3)-Eu(1)-O(20)  | 79.1(3)   |
| Zn(3)-O(24)   | 1.987(14) | O(3)-Eu(1)-O(31)  | 144.7(4)  |
| Zn(3)-O(70)   | 1.940(9)  | O(3)-Eu(1)-O(36)  | 115.6(4)  |
| Zn(3)-O(97)   | 1.984(14) | O(5)-Eu(1)-O(11)  | 143.2(4)  |
| Zn(4)-O(27)   | 1.917(12) | O(5)-Eu(1)-O(13)  | 76.7(4)   |
| Zn(4)-O(28)   | 1.998(10) | O(5)-Eu(1)-O(20)  | 123.2(4)  |
| Zn(4)-O(44)   | 1.993(10) | O(5)-Eu(1)-O(31)  | 134.0(4)  |
| Zn(4)-O(47)   | 1.943(12) | O(5)-Eu(1)-O(36)  | 72.9(4)   |
| Zn(5)-O(15)   | 2.005(10) | O(9)-Eu(1)-O(3)   | 88.0(4)   |
| Zn(5)-O(77)   | 1.962(11) | O(9)-Eu(1)-O(5)   | 75.5(5)   |
| Zn(5)-O(78)   | 1.944(12) | O(9)-Eu(1)-O(11)  | 76.5(4)   |
| Zn(5)-O(84)   | 1.938(11) | O(9)-Eu(1)-O(13)  | 81.7(3)   |
| Zn(6)-N(2)    | 2.123(13) | O(9)-Eu(1)-O(20)  | 153.7(4)  |
| Zn(6)-O(2)    | 2.037(11) | O(9)-Eu(1)-O(31)  | 110.5(4)  |
| Zn(6)-O(16)   | 2.053(10) | O(9)-Eu(1)-O(36)  | 135.1(4)  |
| Zn(6)-O(74)   | 1.968(11) | O(11)-Eu(1)-O(13) | 122.0(3)  |
| Zn(6)-O(94)   | 2.003(14) | O(20)-Eu(1)-O(11) | 78.3(4)   |
| Zn(7)-O(2)    | 2.000(12) | O(20)-Eu(1)-O(13) | 118.6(3)  |
| Zn(7)-O(16)   | 1.958(10) | O(20)-Eu(1)-O(31) | 71.3(3)   |
| Zn(7)-O(62)   | 1.921(14) | O(20)-Eu(1)-O(36) | 71.1(3)   |
| Zn(7)-O(72)   | 1.945(13) | O(31)-Eu(1)-O(11) | 78.6(3)   |
| Zn(8)-O(33)   | 1.989(11) | O(31)-Eu(1)-O(13) | 60.2(3)   |
| Zn(8)-O(49)   | 2.012(10) | O(31)-Eu(1)-O(36) | 72.6(3)   |
| Zn(8)-O(89)   | 2.286(10) | O(36)-Eu(1)-O(11) | 143.2(4)  |
| Zn(8)-O(90)#1 | 2.179(9)  | O(36)-Eu(1)-O(13) | 60.6(3)   |
| Zn(8)-O(90)   | 2.160(10) | O(13)-Eu(2)-O(32) | 132.5(3)  |
| Zn(8)-O(95)   | 2.113(9)  | O(13)-Eu(2)-O(35) | 81.6(3)   |
| Zn(9)-O(22)   | 2.083(10) | O(13)-Eu(2)-O(36) | 71.7(4)   |
| Zn(9)-O(23)   | 2.027(9)  | O(13)-Eu(2)-O(43) | 122.2(4)  |
| Zn(9)-O(34)   | 2.028(11) | O(14)-Eu(2)-O(13) | 83.0(4)   |
| Zn(9)-O(95)   | 2.068(9)  | O(14)-Eu(2)-O(32) | 119.1(3)  |

|                   |          |                   |          |
|-------------------|----------|-------------------|----------|
| O(14)-Eu(2)-O(35) | 69.8(3)  | O(70)-Eu(3)-O(31) | 121.3(3) |
| O(14)-Eu(2)-O(36) | 85.7(3)  | O(92)-Eu(3)-O(23) | 75.6(3)  |
| O(14)-Eu(2)-O(43) | 122.7(3) | O(92)-Eu(3)-O(31) | 141.8(3) |
| O(31)-Eu(2)-O(13) | 71.8(3)  | O(92)-Eu(3)-O(32) | 121.7(3) |
| O(31)-Eu(2)-O(14) | 150.6(3) | O(92)-Eu(3)-O(41) | 69.7(3)  |
| O(31)-Eu(2)-O(32) | 71.6(3)  | O(92)-Eu(3)-O(70) | 72.8(3)  |
| O(31)-Eu(2)-O(35) | 119.3(3) | O(19)-Eu(4)-O(21) | 71.9(4)  |
| O(31)-Eu(2)-O(36) | 72.5(3)  | O(19)-Eu(4)-O(23) | 110.3(4) |
| O(31)-Eu(2)-O(40) | 137.6(3) | O(19)-Eu(4)-O(25) | 81.1(4)  |
| O(31)-Eu(2)-O(43) | 84.3(3)  | O(19)-Eu(4)-O(70) | 75.3(4)  |
| O(32)-Eu(2)-O(43) | 82.7(3)  | O(19)-Eu(4)-O(92) | 139.4(4) |
| O(35)-Eu(2)-O(32) | 143.8(3) | O(19)-Eu(4)-O(96) | 152.5(4) |
| O(35)-Eu(2)-O(36) | 145.8(3) | O(21)-Eu(4)-O(23) | 77.6(3)  |
| O(35)-Eu(2)-O(43) | 65.6(3)  | O(21)-Eu(4)-O(25) | 140.6(4) |
| O(36)-Eu(2)-O(32) | 69.1(3)  | O(21)-Eu(4)-O(70) | 117.5(4) |
| O(36)-Eu(2)-O(43) | 147.8(3) | O(21)-Eu(4)-O(92) | 144.6(3) |
| O(40)-Eu(2)-O(13) | 149.8(4) | O(21)-Eu(4)-O(96) | 81.2(3)  |
| O(40)-Eu(2)-O(14) | 70.1(3)  | O(23)-Eu(4)-O(25) | 140.0(4) |
| O(40)-Eu(2)-O(32) | 74.8(3)  | O(23)-Eu(4)-O(70) | 66.2(3)  |
| O(40)-Eu(2)-O(35) | 76.6(3)  | O(23)-Eu(4)-O(96) | 68.0(3)  |
| O(40)-Eu(2)-O(36) | 118.0(3) | O(25)-Eu(4)-O(70) | 81.1(4)  |
| O(40)-Eu(2)-O(43) | 66.2(3)  | O(25)-Eu(4)-O(96) | 118.7(4) |
| O(20)-Eu(3)-O(23) | 110.5(3) | O(26)-Eu(4)-O(19) | 91.0(5)  |
| O(20)-Eu(3)-O(30) | 82.9(4)  | O(26)-Eu(4)-O(21) | 77.7(4)  |
| O(20)-Eu(3)-O(31) | 69.8(3)  | O(26)-Eu(4)-O(23) | 140.1(4) |
| O(20)-Eu(3)-O(32) | 72.7(3)  | O(26)-Eu(4)-O(25) | 74.6(4)  |
| O(20)-Eu(3)-O(41) | 144.1(3) | O(26)-Eu(4)-O(70) | 153.7(4) |
| O(20)-Eu(3)-O(70) | 79.0(3)  | O(26)-Eu(4)-O(92) | 110.3(4) |
| O(20)-Eu(3)-O(92) | 146.3(3) | O(26)-Eu(4)-O(96) | 77.6(4)  |
| O(23)-Eu(3)-O(31) | 78.3(3)  | O(92)-Eu(4)-O(23) | 75.2(3)  |
| O(23)-Eu(3)-O(32) | 145.6(3) | O(92)-Eu(4)-O(25) | 72.5(4)  |
| O(23)-Eu(3)-O(41) | 69.4(3)  | O(92)-Eu(4)-O(70) | 70.7(3)  |
| O(23)-Eu(3)-O(70) | 67.9(3)  | O(92)-Eu(4)-O(96) | 67.9(3)  |
| O(30)-Eu(3)-O(23) | 137.7(4) | O(96)-Eu(4)-O(70) | 124.0(3) |
| O(30)-Eu(3)-O(31) | 142.0(4) | O(17)-Eu(5)-O(41) | 71.2(3)  |
| O(30)-Eu(3)-O(32) | 76.3(4)  | O(17)-Eu(5)-O(42) | 70.4(3)  |
| O(30)-Eu(3)-O(41) | 122.5(3) | O(17)-Eu(5)-O(44) | 131.1(3) |
| O(30)-Eu(3)-O(70) | 76.2(4)  | O(17)-Eu(5)-O(45) | 77.4(4)  |
| O(30)-Eu(3)-O(92) | 72.9(4)  | O(41)-Eu(5)-O(45) | 137.3(3) |
| O(32)-Eu(3)-O(31) | 70.7(3)  | O(42)-Eu(5)-O(41) | 53.4(3)  |
| O(32)-Eu(3)-O(41) | 88.1(3)  | O(42)-Eu(5)-O(45) | 138.0(3) |
| O(32)-Eu(3)-O(70) | 142.5(3) | O(44)-Eu(5)-O(41) | 146.1(3) |
| O(41)-Eu(3)-O(31) | 75.3(3)  | O(44)-Eu(5)-O(42) | 148.7(3) |
| O(41)-Eu(3)-O(70) | 128.4(3) | O(44)-Eu(5)-O(45) | 53.7(4)  |

|                   |          |                   |          |
|-------------------|----------|-------------------|----------|
| O(48)-Eu(5)-O(17) | 136.6(3) | O(38)-Eu(6)-O(14) | 143.7(4) |
| O(48)-Eu(5)-O(41) | 105.4(3) | O(38)-Eu(6)-O(35) | 79.0(4)  |
| O(48)-Eu(5)-O(42) | 73.8(3)  | O(38)-Eu(6)-O(37) | 78.2(4)  |
| O(48)-Eu(5)-O(44) | 76.0(3)  | O(38)-Eu(6)-O(68) | 91.1(5)  |
| O(48)-Eu(5)-O(45) | 117.2(3) | O(38)-Eu(6)-O(80) | 140.9(5) |
| O(48)-Eu(5)-O(92) | 144.9(3) | O(38)-Eu(6)-O(98) | 71.6(4)  |
| O(48)-Eu(5)-O(96) | 76.3(3)  | O(68)-Eu(6)-O(37) | 75.5(4)  |
| O(53)-Eu(5)-O(17) | 75.5(3)  | O(68)-Eu(6)-O(80) | 67.9(5)  |
| O(53)-Eu(5)-O(41) | 118.8(3) | O(68)-Eu(6)-O(98) | 76.9(5)  |
| O(53)-Eu(5)-O(42) | 67.6(3)  | O(98)-Eu(6)-O(80) | 71.7(5)  |
| O(53)-Eu(5)-O(44) | 93.7(3)  | O(14)-Eu(7)-O(78) | 132.2(3) |
| O(53)-Eu(5)-O(45) | 78.8(3)  | O(37)-Eu(7)-O(14) | 69.9(3)  |
| O(53)-Eu(5)-O(48) | 68.8(3)  | O(37)-Eu(7)-O(78) | 134.5(3) |
| O(53)-Eu(5)-O(92) | 145.8(3) | O(40)-Eu(7)-O(14) | 70.2(3)  |
| O(53)-Eu(5)-O(96) | 145.0(3) | O(40)-Eu(7)-O(37) | 70.2(3)  |
| O(92)-Eu(5)-O(17) | 75.7(3)  | O(40)-Eu(7)-O(78) | 81.2(3)  |
| O(92)-Eu(5)-O(41) | 67.5(3)  | O(40)-Eu(7)-O(79) | 134.7(4) |
| O(92)-Eu(5)-O(42) | 118.2(3) | O(40)-Eu(7)-O(85) | 88.2(4)  |
| O(92)-Eu(5)-O(44) | 91.5(3)  | O(40)-Eu(7)-O(87) | 87.3(3)  |
| O(92)-Eu(5)-O(45) | 77.3(3)  | O(69)-Eu(7)-O(14) | 85.6(4)  |
| O(96)-Eu(5)-O(17) | 136.5(4) | O(69)-Eu(7)-O(37) | 80.2(4)  |
| O(96)-Eu(5)-O(41) | 72.5(3)  | O(69)-Eu(7)-O(40) | 146.7(4) |
| O(96)-Eu(5)-O(42) | 105.3(3) | O(69)-Eu(7)-O(78) | 131.8(4) |
| O(96)-Eu(5)-O(44) | 75.1(3)  | O(69)-Eu(7)-O(79) | 78.5(5)  |
| O(96)-Eu(5)-O(45) | 116.6(3) | O(69)-Eu(7)-O(85) | 105.3(5) |
| O(96)-Eu(5)-O(92) | 68.7(3)  | O(69)-Eu(7)-O(87) | 98.5(4)  |
| O(12)-Eu(6)-O(35) | 77.7(4)  | O(79)-Eu(7)-O(14) | 138.2(4) |
| O(12)-Eu(6)-O(37) | 143.9(4) | O(79)-Eu(7)-O(37) | 142.2(4) |
| O(12)-Eu(6)-O(68) | 136.4(4) | O(79)-Eu(7)-O(78) | 53.5(4)  |
| O(12)-Eu(6)-O(80) | 71.7(5)  | O(85)-Eu(7)-O(14) | 70.2(4)  |
| O(12)-Eu(6)-O(98) | 75.5(5)  | O(85)-Eu(7)-O(37) | 139.1(4) |
| O(14)-Eu(6)-O(12) | 83.4(4)  | O(85)-Eu(7)-O(78) | 71.4(4)  |
| O(14)-Eu(6)-O(35) | 71.7(3)  | O(85)-Eu(7)-O(79) | 77.1(4)  |
| O(14)-Eu(6)-O(37) | 72.0(3)  | O(87)-Eu(7)-O(14) | 140.9(3) |
| O(14)-Eu(6)-O(68) | 100.8(4) | O(87)-Eu(7)-O(37) | 72.5(3)  |
| O(14)-Eu(6)-O(80) | 74.6(4)  | O(87)-Eu(7)-O(78) | 71.3(4)  |
| O(14)-Eu(6)-O(98) | 144.4(4) | O(87)-Eu(7)-O(79) | 80.1(4)  |
| O(35)-Eu(6)-O(37) | 69.8(3)  | O(87)-Eu(7)-O(85) | 142.8(4) |
| O(35)-Eu(6)-O(68) | 145.2(4) | O(35)-Eu(8)-O(43) | 65.6(3)  |
| O(35)-Eu(6)-O(80) | 136.4(4) | O(37)-Eu(8)-O(35) | 69.8(3)  |
| O(35)-Eu(6)-O(98) | 129.1(4) | O(37)-Eu(8)-O(39) | 82.4(4)  |
| O(37)-Eu(6)-O(80) | 123.7(4) | O(37)-Eu(8)-O(40) | 70.4(3)  |
| O(37)-Eu(6)-O(98) | 138.3(4) | O(37)-Eu(8)-O(43) | 122.9(3) |
| O(38)-Eu(6)-O(12) | 111.0(4) | O(37)-Eu(8)-O(60) | 149.9(3) |

|                   |          |                    |          |
|-------------------|----------|--------------------|----------|
| O(37)-Eu(8)-O(75) | 85.1(3)  | O(88)-Eu(9)-O(71)  | 76.6(4)  |
| O(37)-Eu(8)-O(91) | 120.2(3) | O(88)-Eu(9)-O(75)  | 88.4(4)  |
| O(39)-Eu(8)-O(35) | 81.3(3)  | O(88)-Eu(9)-O(87)  | 46.2(3)  |
| O(39)-Eu(8)-O(43) | 122.4(3) | O(88)-Eu(9)-O(91)  | 126.3(3) |
| O(39)-Eu(8)-O(91) | 132.7(3) | O(91)-Eu(9)-O(63)  | 72.4(3)  |
| O(40)-Eu(8)-O(35) | 75.8(3)  | O(91)-Eu(9)-O(87)  | 80.0(3)  |
| O(40)-Eu(8)-O(39) | 149.1(3) | C(71)-Eu(9)-O(87)  | 23.9(3)  |
| O(40)-Eu(8)-O(43) | 65.6(3)  | O(42)-Eu(10)-O(55) | 129.4(3) |
| O(40)-Eu(8)-O(75) | 119.3(3) | O(42)-Eu(10)-O(60) | 75.3(3)  |
| O(40)-Eu(8)-O(91) | 75.8(3)  | O(53)-Eu(10)-O(42) | 69.0(3)  |
| O(60)-Eu(8)-O(35) | 119.0(3) | O(53)-Eu(10)-O(55) | 74.3(3)  |
| O(60)-Eu(8)-O(39) | 71.5(3)  | O(53)-Eu(10)-O(60) | 141.3(3) |
| O(60)-Eu(8)-O(40) | 138.3(3) | O(53)-Eu(10)-O(91) | 119.9(3) |
| O(60)-Eu(8)-O(43) | 84.7(3)  | O(54)-Eu(10)-O(42) | 70.9(3)  |
| O(60)-Eu(8)-O(75) | 72.5(3)  | O(54)-Eu(10)-O(53) | 76.5(3)  |
| O(60)-Eu(8)-O(91) | 71.4(3)  | O(54)-Eu(10)-O(55) | 67.4(3)  |
| O(75)-Eu(8)-O(35) | 144.9(3) | O(54)-Eu(10)-O(60) | 78.1(3)  |
| O(75)-Eu(8)-O(39) | 71.0(3)  | O(54)-Eu(10)-O(67) | 136.8(3) |
| O(75)-Eu(8)-O(43) | 148.5(3) | O(54)-Eu(10)-O(91) | 144.7(3) |
| O(75)-Eu(8)-O(91) | 70.5(3)  | O(60)-Eu(10)-O(55) | 120.9(3) |
| O(91)-Eu(8)-O(35) | 143.4(3) | O(63)-Eu(10)-O(42) | 144.1(3) |
| O(91)-Eu(8)-O(43) | 81.9(3)  | O(63)-Eu(10)-O(53) | 146.9(3) |
| O(63)-Eu(9)-O(87) | 137.9(3) | O(63)-Eu(10)-O(54) | 111.2(3) |
| O(64)-Eu(9)-O(63) | 75.6(3)  | O(63)-Eu(10)-O(55) | 79.2(3)  |
| O(64)-Eu(9)-O(71) | 82.0(4)  | O(63)-Eu(10)-O(60) | 70.4(3)  |
| O(64)-Eu(9)-O(75) | 146.5(4) | O(63)-Eu(10)-O(67) | 82.3(4)  |
| O(64)-Eu(9)-O(76) | 73.7(4)  | O(63)-Eu(10)-O(91) | 73.2(3)  |
| O(64)-Eu(9)-O(87) | 141.7(3) | O(67)-Eu(10)-O(42) | 121.8(3) |
| O(64)-Eu(9)-O(88) | 119.9(4) | O(67)-Eu(10)-O(53) | 72.2(3)  |
| O(64)-Eu(9)-O(91) | 100.1(4) | O(67)-Eu(10)-O(55) | 75.8(4)  |
| O(71)-Eu(9)-O(63) | 77.4(3)  | O(67)-Eu(10)-O(60) | 143.0(3) |
| O(71)-Eu(9)-O(75) | 88.3(4)  | O(67)-Eu(10)-O(91) | 78.0(3)  |
| O(71)-Eu(9)-O(87) | 117.7(3) | O(91)-Eu(10)-O(42) | 85.6(3)  |
| O(71)-Eu(9)-O(91) | 148.1(3) | O(91)-Eu(10)-O(55) | 144.1(3) |
| O(75)-Eu(9)-O(63) | 71.0(3)  | O(91)-Eu(10)-O(60) | 70.5(3)  |
| O(75)-Eu(9)-O(87) | 70.5(3)  | O(16)-Eu(11)-O(39) | 155.5(3) |
| O(75)-Eu(9)-O(91) | 72.2(3)  | O(16)-Eu(11)-O(63) | 77.8(4)  |
| O(76)-Eu(9)-O(63) | 134.0(4) | O(16)-Eu(11)-O(73) | 76.3(4)  |
| O(76)-Eu(9)-O(71) | 129.9(4) | O(16)-Eu(11)-O(75) | 116.2(3) |
| O(76)-Eu(9)-O(75) | 133.8(4) | O(60)-Eu(11)-O(16) | 143.1(4) |
| O(76)-Eu(9)-O(87) | 68.6(3)  | O(60)-Eu(11)-O(39) | 61.3(3)  |
| O(76)-Eu(9)-O(88) | 78.7(4)  | O(60)-Eu(11)-O(63) | 72.0(3)  |
| O(76)-Eu(9)-O(91) | 80.2(4)  | O(60)-Eu(11)-O(73) | 77.5(3)  |
| O(88)-Eu(9)-O(63) | 147.1(4) | O(60)-Eu(11)-O(75) | 73.2(3)  |

|                    |          |                    |          |
|--------------------|----------|--------------------|----------|
| O(60)-Eu(11)-O(93) | 109.0(3) | O(56)-Eu(12)-O(59) | 81.1(4)  |
| O(61)-Eu(11)-O(16) | 79.1(4)  | O(59)-Eu(12)-O(53) | 71.7(4)  |
| O(61)-Eu(11)-O(39) | 76.9(4)  | O(59)-Eu(12)-O(55) | 80.3(4)  |
| O(61)-Eu(11)-O(60) | 135.3(4) | O(7)-Eu(13)-O(20)  | 78.2(4)  |
| O(61)-Eu(11)-O(63) | 121.9(4) | O(7)-Eu(13)-O(29)  | 83.9(5)  |
| O(61)-Eu(11)-O(73) | 143.3(4) | O(7)-Eu(13)-O(32)  | 147.5(4) |
| O(61)-Eu(11)-O(75) | 73.0(4)  | O(7)-Eu(13)-O(36)  | 87.0(4)  |
| O(61)-Eu(11)-O(93) | 77.1(4)  | O(7)-Eu(13)-O(83)  | 130.4(4) |
| O(63)-Eu(11)-O(39) | 119.7(3) | O(7)-Eu(13)-O(86)  | 76.3(4)  |
| O(63)-Eu(11)-O(73) | 78.8(3)  | O(29)-Eu(13)-O(20) | 75.5(4)  |
| O(63)-Eu(11)-O(75) | 71.1(3)  | O(32)-Eu(13)-O(20) | 71.5(3)  |
| O(73)-Eu(11)-O(39) | 121.7(3) | O(32)-Eu(13)-O(29) | 99.2(4)  |
| O(75)-Eu(11)-O(39) | 60.8(3)  | O(32)-Eu(13)-O(83) | 80.9(4)  |
| O(75)-Eu(11)-O(73) | 143.0(3) | O(32)-Eu(13)-O(86) | 124.2(4) |
| O(93)-Eu(11)-O(16) | 88.9(4)  | O(36)-Eu(13)-O(20) | 70.8(4)  |
| O(93)-Eu(11)-O(39) | 80.9(3)  | O(36)-Eu(13)-O(29) | 146.2(4) |
| O(93)-Eu(11)-O(63) | 153.3(4) | O(36)-Eu(13)-O(32) | 72.4(3)  |
| O(93)-Eu(11)-O(73) | 75.5(4)  | O(36)-Eu(13)-O(83) | 132.8(4) |
| O(93)-Eu(11)-O(75) | 135.5(4) | O(36)-Eu(13)-O(86) | 83.8(4)  |
| O(46)-Eu(12)-O(48) | 77.2(4)  | O(83)-Eu(13)-O(20) | 135.3(4) |
| O(46)-Eu(12)-O(52) | 77.9(4)  | O(83)-Eu(13)-O(29) | 75.1(4)  |
| O(46)-Eu(12)-O(53) | 108.7(3) | O(83)-Eu(13)-O(86) | 80.1(5)  |
| O(46)-Eu(12)-O(54) | 141.3(3) | O(86)-Eu(13)-O(20) | 144.6(4) |
| O(46)-Eu(12)-O(55) | 153.0(3) | O(86)-Eu(13)-O(29) | 125.0(4) |
| O(46)-Eu(12)-O(56) | 89.7(4)  | O(1)-Zn(1)-N(1)    | 87.3(5)  |
| O(46)-Eu(12)-O(59) | 74.7(4)  | O(1)-Zn(1)-O(3)    | 79.1(4)  |
| O(48)-Eu(12)-O(53) | 66.5(3)  | O(3)-Zn(1)-N(1)    | 157.1(5) |
| O(48)-Eu(12)-O(55) | 124.4(3) | O(8)-Zn(1)-N(1)    | 98.5(5)  |
| O(48)-Eu(12)-O(59) | 117.4(4) | O(8)-Zn(1)-O(1)    | 105.4(6) |
| O(52)-Eu(12)-O(48) | 81.8(3)  | O(8)-Zn(1)-O(3)    | 102.8(5) |
| O(52)-Eu(12)-O(53) | 144.3(3) | O(8)-Zn(1)-O(10)   | 100.1(6) |
| O(52)-Eu(12)-O(54) | 79.4(3)  | O(10)-Zn(1)-N(1)   | 92.7(5)  |
| O(52)-Eu(12)-O(55) | 118.1(3) | O(10)-Zn(1)-O(1)   | 154.2(6) |
| O(52)-Eu(12)-O(59) | 141.2(4) | O(10)-Zn(1)-O(3)   | 91.7(5)  |
| O(53)-Eu(12)-O(55) | 71.9(3)  | O(3)-Zn(2)-O(1)    | 83.1(4)  |
| O(54)-Eu(12)-O(48) | 68.9(3)  | O(4)-Zn(2)-O(1)    | 104.1(6) |
| O(54)-Eu(12)-O(53) | 74.4(3)  | O(4)-Zn(2)-O(3)    | 116.8(6) |
| O(54)-Eu(12)-O(55) | 65.6(3)  | O(6)-Zn(2)-O(1)    | 121.8(5) |
| O(54)-Eu(12)-O(59) | 137.7(3) | O(6)-Zn(2)-O(3)    | 123.8(6) |
| O(56)-Eu(12)-O(48) | 152.5(4) | O(6)-Zn(2)-O(4)    | 105.2(7) |
| O(56)-Eu(12)-O(52) | 71.8(4)  | O(24)-Zn(3)-O(18)  | 112.3(6) |
| O(56)-Eu(12)-O(53) | 141.0(3) | O(70)-Zn(3)-O(18)  | 103.0(5) |
| O(56)-Eu(12)-O(54) | 112.2(4) | O(70)-Zn(3)-O(24)  | 111.3(5) |
| O(56)-Eu(12)-O(55) | 76.5(3)  | O(70)-Zn(3)-O(97)  | 118.0(6) |

|                     |          |                     |          |
|---------------------|----------|---------------------|----------|
| O(97)-Zn(3)-O(18)   | 103.8(6) | O(49)-Zn(8)-O(90)#1 | 164.3(4) |
| O(97)-Zn(3)-O(24)   | 108.2(7) | O(49)-Zn(8)-O(90)   | 91.4(4)  |
| O(27)-Zn(4)-O(28)   | 117.3(5) | O(49)-Zn(8)-O(95)   | 100.6(4) |
| O(27)-Zn(4)-O(44)   | 111.1(5) | O(90)#1-Zn(8)-O(89) | 80.3(3)  |
| O(27)-Zn(4)-O(47)   | 105.0(6) | O(90)-Zn(8)-O(89)   | 81.4(4)  |
| O(44)-Zn(4)-O(28)   | 99.4(4)  | O(90)-Zn(8)-O(90)#1 | 76.6(4)  |
| O(47)-Zn(4)-O(28)   | 117.7(5) | O(95)-Zn(8)-O(89)   | 166.7(4) |
| O(47)-Zn(4)-O(44)   | 105.7(5) | O(95)-Zn(8)-O(90)   | 88.2(4)  |
| O(77)-Zn(5)-O(15)   | 118.3(5) | O(95)-Zn(8)-O(90)#1 | 89.3(3)  |
| O(78)-Zn(5)-O(15)   | 105.7(4) | O(23)-Zn(9)-O(22)   | 94.9(4)  |
| O(78)-Zn(5)-O(77)   | 107.7(5) | O(23)-Zn(9)-O(34)   | 89.7(4)  |
| O(84)-Zn(5)-O(15)   | 115.3(5) | O(23)-Zn(9)-O(95)   | 169.8(3) |
| O(84)-Zn(5)-O(77)   | 100.2(5) | O(23)-Zn(9)-O(96)   | 79.7(4)  |
| O(84)-Zn(5)-O(78)   | 109.3(5) | O(34)-Zn(9)-O(22)   | 99.7(4)  |
| O(2)-Zn(6)-N(2)     | 87.9(5)  | O(34)-Zn(9)-O(95)   | 93.7(4)  |
| O(2)-Zn(6)-O(16)    | 78.2(4)  | O(34)-Zn(9)-O(96)   | 159.4(4) |
| O(16)-Zn(6)-N(2)    | 160.9(5) | O(95)-Zn(9)-O(22)   | 94.0(4)  |
| O(74)-Zn(6)-N(2)    | 95.6(5)  | O(96)-Zn(9)-O(22)   | 98.8(4)  |
| O(74)-Zn(6)-O(2)    | 160.2(6) | O(96)-Zn(9)-O(95)   | 94.1(4)  |
| O(74)-Zn(6)-O(16)   | 93.2(4)  | O(48)-Zn(10)-O(51)  | 98.1(4)  |
| O(74)-Zn(6)-O(94)   | 96.5(5)  | O(48)-Zn(10)-O(54)  | 80.0(3)  |
| O(94)-Zn(6)-N(2)    | 95.7(5)  | O(48)-Zn(10)-O(95)  | 94.9(3)  |
| O(94)-Zn(6)-O(2)    | 102.6(6) | O(50)-Zn(10)-O(48)  | 158.5(4) |
| O(94)-Zn(6)-O(16)   | 100.0(5) | O(50)-Zn(10)-O(51)  | 100.8(4) |
| O(16)-Zn(7)-O(2)    | 81.4(4)  | O(50)-Zn(10)-O(54)  | 87.7(4)  |
| O(62)-Zn(7)-O(2)    | 103.7(6) | O(50)-Zn(10)-O(95)  | 94.2(4)  |
| O(62)-Zn(7)-O(16)   | 115.5(5) | O(51)-Zn(10)-O(95)  | 93.3(4)  |
| O(62)-Zn(7)-O(72)   | 108.5(6) | O(54)-Zn(10)-O(51)  | 96.4(4)  |
| O(72)-Zn(7)-O(2)    | 118.8(5) | O(54)-Zn(10)-O(95)  | 169.6(4) |
| O(72)-Zn(7)-O(16)   | 125.0(5) | O(55)-Zn(11)-O(57)  | 105.6(5) |
| O(33)-Zn(8)-O(49)   | 97.0(5)  | O(55)-Zn(11)-O(58)  | 114.1(6) |
| O(33)-Zn(8)-O(89)   | 87.8(4)  | O(58)-Zn(11)-O(57)  | 109.7(7) |
| O(33)-Zn(8)-O(90)   | 166.1(4) | O(66)-Zn(11)-O(55)  | 120.2(5) |
| O(33)-Zn(8)-O(90)#1 | 93.0(4)  | O(66)-Zn(11)-O(57)  | 103.9(6) |
| O(33)-Zn(8)-O(95)   | 101.0(4) | O(66)-Zn(11)-O(58)  | 102.7(6) |
| O(49)-Zn(8)-O(89)   | 88.0(4)  |                     |          |

---
